# Supplementary material for: When the Sum of the Parts Tells You More Than the Whole: The Advantage of Using Metagenomics to Characterize Bartonella spp. Infections in Norway Rats (Rattus norvegicus) and Their Fleas
Source: Front Vet Sci. 2020 Oct 29;7:584724. doi: 10.3389/fvets.2020.584724 (PMC7658385; doi:10.3389/fvets.2020.584724)
Supplement: Supplementary Data Sheet 2 — PCR, Sanger sequencing and metagenomic results. [file Data_Sheet_2.xlsx]

## Sheet: R1-R2 read counts for all sampl
READ	Seq Variant DADA2	%ID	Length	Short name	Hit	Direction	Sample prevalence	TOTAL OBSERVATIONS	BA-1	BA-10	BA-101	BA-123	BA-126	BA-128	BA-135	BA-152	BA-189	BA-22	BA-26	BA-3	BA-34	BA-37	BA-39	BA-4	BA-40	BA-5	BA-51	BA-59	BA-60	BA-65	BA-7	BA-73	BA-75	BA-8	BA-9	BB-113	BB-116	BB-118	BB-120	BB-122	BB-129	BB-132	BB-134	BB-136	BB-137	BB-142	BB-148	BB-150	BB-167
R1	e2da3ea151e42a91c234e6478839d3a7	100	150	tribocorum	NC_010161.1 Bartonella tribocorum CIP 105476 complete genome, type strain CIP 105476	-	93	292673	918	1475	2163	3611	5688	2567	1531	4615	1953	603	116	2722	58	0	0	4400	6286	1745	2422	2565	2178	2767	8891	5069	3858	4165	115	4279	10	2444	1237	7051	898	176	13	3310	51	3899	3397	1513	3543
R1	5489c5eefaf06a203c2fa1c775eebe3d	99.3	150	vinsonii	NC_020301.1 Bartonella vinsonii subsp. berkhoffii str. Winnie, complete genome	-	52	70448	0	292	96	0	0	15	0	3	0	1207	2611	999	486	0	338	0	114	0	8	0	6	0	0	0	21	72	821	0	0	0	26	65	26	734	371	0	526	0	0	168	0
R1	e50ab2548f9ec2e63689084b0669e054	100	150	vinsonii	NC_020301.1 Bartonella vinsonii subsp. berkhoffii str. Winnie, complete genome	-	24	9131	0	289	0	0	0	0	0	0	0	0	0	0	0	0	508	0	0	0	0	0	0	0	0	0	0	0	0	0	0	0	0	0	0	59	0	0	60	0	14	0	82
R1	b94c58440a0bcf9c133cbb0d19e91097	97.3	150	tribocorum	NC_010161.1 Bartonella tribocorum CIP 105476 complete genome, type strain CIP 105476	-	6	45	0	0	0	0	0	0	0	0	0	0	0	5	0	0	0	0	11	0	0	0	0	5	10	0	0	0	0	0	0	6	0	0	0	0	0	0	0	0	0	0	0
R1	19706aeabb6fe37fae886e134085f60b	99.3	150	vinsonii	NC_020301.1 Bartonella vinsonii subsp. berkhoffii str. Winnie, complete genome	-	3	527	0	0	0	0	0	0	0	0	0	0	0	0	0	0	0	0	0	0	0	0	0	0	0	0	0	0	0	0	0	0	0	0	0	0	0	0	0	0	0	0	0
R1	0e7a83f35334a20a6c6ecc8d28ee2e62	99.3	150	tribocorum	NC_010161.1 Bartonella tribocorum CIP 105476 complete genome, type strain CIP 105476	-	1	2274	0	0	0	0	0	0	0	0	0	0	0	0	0	0	0	0	0	0	0	0	0	0	0	0	0	0	0	0	0	0	0	0	0	0	0	0	0	0	0	0	0
R1	12b8ce200ec124360e6a698d64cd2bb5	99.3	150	tribocorum	NC_010161.1 Bartonella tribocorum CIP 105476 complete genome, type strain CIP 105476	-	1	333	0	333	0	0	0	0	0	0	0	0	0	0	0	0	0	0	0	0	0	0	0	0	0	0	0	0	0	0	0	0	0	0	0	0	0	0	0	0	0	0	0
R1	302856ef7f471f53c5ef7f9726ae1f7d	99.3	150	vinsonii	NC_020301.1 Bartonella vinsonii subsp. berkhoffii str. Winnie, complete genome	-	1	101	0	0	0	0	0	0	0	0	0	0	0	0	0	0	0	0	0	0	0	0	0	0	0	0	0	0	0	0	0	0	0	0	0	0	0	0	0	0	0	0	0
R1	4348268acd6a16df5e4a4e7fce8b8fb1	99.3	150	vinsonii	NC_020301.1 Bartonella vinsonii subsp. berkhoffii str. Winnie, complete genome	-	1	396	0	0	0	0	0	0	0	0	0	0	0	0	0	0	0	0	0	0	0	0	0	0	0	0	0	0	396	0	0	0	0	0	0	0	0	0	0	0	0	0	0
R1	6216aee003ac513b9bad7d08594b6d13	99.3	150	tribocorum	NC_010161.1 Bartonella tribocorum CIP 105476 complete genome, type strain CIP 105476	-	1	589	0	589	0	0	0	0	0	0	0	0	0	0	0	0	0	0	0	0	0	0	0	0	0	0	0	0	0	0	0	0	0	0	0	0	0	0	0	0	0	0	0
R1	9de79056970fb016983be714e22b4a88	99.3	150	tribocorum	NC_010161.1 Bartonella tribocorum CIP 105476 complete genome, type strain CIP 105476	-	1	255	0	0	0	0	0	0	0	0	0	0	0	0	0	0	0	0	0	0	0	0	0	0	0	0	0	0	0	0	0	0	0	0	0	0	0	0	0	0	0	0	0
R1	cea096a395e7fc30081173e215d77651	99.3	150	tribocorum	NC_010161.1 Bartonella tribocorum CIP 105476 complete genome, type strain CIP 105476	-	1	643	0	643	0	0	0	0	0	0	0	0	0	0	0	0	0	0	0	0	0	0	0	0	0	0	0	0	0	0	0	0	0	0	0	0	0	0	0	0	0	0	0
R1	f16cb055ecb5a49c2e8f7ff8ee1e43c8	99.3	150	tribocorum	NC_010161.1 Bartonella tribocorum CIP 105476 complete genome, type strain CIP 105476	-	1	678	0	0	0	0	0	0	0	0	0	0	0	0	0	0	0	0	0	0	0	0	0	0	0	0	0	0	0	0	0	0	0	0	0	0	0	0	0	0	0	0	0
R1	0b7f0e34898247684a9827d6a03471c4	98.7	150	vinsonii	NC_020301.1 Bartonella vinsonii subsp. berkhoffii str. Winnie, complete genome	-	1	43	0	0	0	0	0	0	0	0	0	0	0	0	0	0	0	0	0	0	0	0	0	0	0	0	0	0	0	0	0	0	0	0	0	0	0	0	0	0	0	0	0
R1	88da79b12d9b7638f478efb77490f8d3	98.7	150	vinsonii	NC_020301.1 Bartonella vinsonii subsp. berkhoffii str. Winnie, complete genome	-	1	245	0	0	0	0	0	0	0	0	0	0	0	0	0	0	0	0	0	0	0	0	0	0	0	0	0	0	0	0	0	0	0	0	0	0	0	0	0	0	0	0	0
R1	9b4f8600549299ba67f75227ec3c9ee7	98.7	150	vinsonii	NC_020301.1 Bartonella vinsonii subsp. berkhoffii str. Winnie, complete genome	-	1	135	0	0	0	0	0	0	0	0	0	0	0	0	0	0	0	0	0	0	0	0	0	0	0	0	0	0	0	0	0	0	0	0	0	0	0	0	0	0	0	0	0
R1	a1beb4f3331f16d5cfaf83e0ce9631c6	98.7	150	tribocorum	NC_010161.1 Bartonella tribocorum CIP 105476 complete genome, type strain CIP 105476	-	1	29	0	0	0	0	0	0	0	0	0	0	0	0	0	0	0	0	0	0	0	0	0	0	0	0	0	0	0	0	0	0	0	0	0	0	0	0	0	0	0	0	0
R1	a32ca3c8bda01195383672def7247a3d	98.7	150	vinsonii	NC_020301.1 Bartonella vinsonii subsp. berkhoffii str. Winnie, complete genome	-	1	286	0	0	0	0	0	0	0	0	0	0	0	0	0	0	0	0	0	0	0	0	0	0	0	0	0	0	0	0	0	0	0	0	0	0	0	0	0	0	0	0	0
R1	48e71516ad91317c276bf75b8690ad2d	97.3	150	vinsonii	NC_020301.1 Bartonella vinsonii subsp. berkhoffii str. Winnie, complete genome	-	1	14	0	0	0	0	0	0	0	0	0	0	0	0	0	0	0	0	0	0	0	0	0	0	0	0	0	0	0	0	0	0	0	0	0	0	0	0	0	0	0	0	0
.	.	.	.	TRIBOCURM	.	.	93	297519	918	3040	2163	3611	5688	2567	1531	4615	1953	603	116	2727	58	0	0	4400	6297	1745	2422	2565	2178	2772	8901	5069	3858	4165	115	4279	10	2450	1237	7051	898	176	13	3310	51	3899	3397	1513	3543
.	.	.	.	VINSONII	.	.	58	81326	0	581	96	0	0	15	0	3	0	1207	2611	999	486	0	846	0	114	0	8	0	6	0	0	0	21	72	1217	0	0	0	26	65	26	793	371	0	586	0	14	168	82
				TOTAL					918	3621	2259	3611	5688	2582	1531	4618	1953	1810	2727	3726	544	0	846	4400	6411	1745	2430	2565	2184	2772	8901	5069	3879	4237	1332	4279	10	2450	1263	7116	924	969	384	3310	637	3899	3411	1681	3625
READ	Seq Variant DADA2	%ID	Length	Short name	Hit	Direction	Sample prevalence	TOTAL OBSERVATIONS	BA-1	BA-10	BA-101	BA-123	BA-126	BA-128	BA-135	BA-152	BA-189	BA-22	BA-26	BA-3	BA-34	BA-37	BA-39	BA-4	BA-40	BA-5	BA-51	BA-59	BA-60	BA-65	BA-7	BA-73	BA-75	BA-8	BA-9	BB-113	BB-116	BB-118	BB-120	BB-122	BB-129	BB-132	BB-134	BB-136	BB-137	BB-142	BB-148	BB-150	BB-167
R2	c6be71c1facbb95a477f2eeea204b0ac	98.7	150	tribocorum	NC_010161.1 Bartonella tribocorum CIP 105476 complete genome, type strain CIP 105476	+	85	289855	264	2393	2122	3639	5783	2524	1533	4451	1961	403	0	2782	0	0	0	4425	6396	1723	2410	2579	1981	2789	8911	5058	3853	4115	13	4274	4	2401	1202	7040	919	0	4	3339	0	3833	3404	1357	3385
R2	aee0dd3068863a774f26e368f4f0bf71	99.3	150	vinsonii	NC_020301.1 Bartonella vinsonii subsp. berkhoffii str. Winnie, complete genome	+	55	68498	0	260	91	0	0	12	0	0	0	1160	2448	1005	429	0	338	0	118	0	7	0	0	0	0	3	20	82	531	0	0	0	26	58	18	761	270	0	452	0	0	188	0
R2	c37cb971b8ea7d86231c01824a95a4f3	100	150	vinsonii	NC_020301.1 Bartonella vinsonii subsp. berkhoffii str. Winnie, complete genome	+	25	9051	0	291	0	0	0	0	0	0	0	0	0	0	0	0	430	0	0	0	0	0	0	0	3	0	0	0	0	0	0	0	0	0	0	60	0	0	47	0	15	0	78
R2	620b0c175af01c89011174f061f919dd	100	150	tribocorum	NC_010161.1 Bartonella tribocorum CIP 105476 complete genome, type strain CIP 105476	+	18	3275	655	0	0	0	0	0	0	0	0	0	127	16	45	0	0	13	0	30	0	0	0	0	49	0	0	53	100	0	0	0	0	0	0	172	0	0	53	0	0	84	0
R2	c8c3b47c381a6151a803ad368bdd3b7a	99.3	150	vinsonii	NC_020301.1 Bartonella vinsonii subsp. berkhoffii str. Winnie, complete genome	+	1	30	0	0	0	0	0	0	0	0	0	0	0	0	0	0	0	0	0	0	0	0	0	0	0	0	0	0	0	0	0	0	0	0	0	0	0	0	0	0	0	0	0
R2	d61586675ddd925f3aab2d54a12f5465	99.3	150	tribocorum	NC_010161.1 Bartonella tribocorum CIP 105476 complete genome, type strain CIP 105476	+	1	112	0	0	0	0	0	0	0	0	0	0	0	0	0	0	0	0	0	0	0	0	0	0	0	0	0	0	0	0	0	0	0	0	0	0	0	0	0	0	0	0	0
R2	29ee7954158d4aac2daab686f5495800	98.7	150	vinsonii	NC_020301.1 Bartonella vinsonii subsp. berkhoffii str. Winnie, complete genome	+	1	401	0	0	0	0	0	0	0	0	0	0	0	0	0	0	0	0	0	0	0	0	0	0	0	0	0	0	401	0	0	0	0	0	0	0	0	0	0	0	0	0	0
R2	3df9d3481870b5b684f4fc9289f10d1d	98.7	150	vinsonii	NC_020301.1 Bartonella vinsonii subsp. berkhoffii str. Winnie, complete genome	+	1	191	0	0	0	0	0	0	0	0	0	0	0	0	0	0	0	0	0	0	0	0	0	0	0	0	0	0	0	0	0	0	0	0	0	0	0	0	0	0	0	0	0
R2	6e02019ab6c9fd05ac57cf6aaf165b30	98.7	150	vinsonii	NC_020301.1 Bartonella vinsonii subsp. berkhoffii str. Winnie, complete genome	+	1	246	0	0	0	0	0	0	0	0	0	0	0	0	0	0	0	0	0	0	0	0	0	0	0	0	0	0	246	0	0	0	0	0	0	0	0	0	0	0	0	0	0
R2	8ed9cae602237d196a3dcde3eaa0c510	98.7	150	vinsonii	NC_020301.1 Bartonella vinsonii subsp. berkhoffii str. Winnie, complete genome	+	1	56	0	0	0	0	0	0	0	0	0	0	0	0	0	0	0	0	0	0	0	0	0	0	0	0	0	0	0	0	0	0	0	0	0	0	0	0	0	0	0	0	0
R2	7b2e94a45157b2a567ebdb7488e3d126	98	150	tribocorum	NC_010161.1 Bartonella tribocorum CIP 105476 complete genome, type strain CIP 105476	+	1	169	0	0	0	0	0	0	0	0	0	169	0	0	0	0	0	0	0	0	0	0	0	0	0	0	0	0	0	0	0	0	0	0	0	0	0	0	0	0	0	0	0
R2	7ffa5927294d179502f52c2942433a9c	98	150	tribocorum	NC_010161.1 Bartonella tribocorum CIP 105476 complete genome, type strain CIP 105476	+	1	1156	0	0	0	0	0	0	0	0	0	0	0	0	0	0	0	0	0	0	0	0	0	0	0	0	0	0	0	0	0	0	0	0	0	0	0	0	0	0	0	0	0
R2	99962ad2012ddc07fd65fad5976b83dc	98	150	tribocorum	NC_010161.1 Bartonella tribocorum CIP 105476 complete genome, type strain CIP 105476	+	1	1051	0	0	0	0	0	0	0	0	0	0	0	0	0	0	0	0	0	0	0	0	0	0	0	0	0	0	0	0	0	0	0	0	0	0	0	0	0	0	0	0	0
R2	bb8b87da94522f9ce4802a3c269d5400	98	150	tribocorum	NC_010161.1 Bartonella tribocorum CIP 105476 complete genome, type strain CIP 105476	+	1	303	0	0	0	0	0	0	0	0	0	0	0	0	0	0	0	0	0	0	0	0	0	0	0	0	0	0	0	0	0	0	0	0	0	0	0	0	0	0	0	0	0
R2	ee7d242ed76ec9ae798dc06c9a8c2a5d	98	150	tribocorum	NC_010161.1 Bartonella tribocorum CIP 105476 complete genome, type strain CIP 105476	+	1	687	0	687	0	0	0	0	0	0	0	0	0	0	0	0	0	0	0	0	0	0	0	0	0	0	0	0	0	0	0	0	0	0	0	0	0	0	0	0	0	0	0
.	.	.	.	TRIBOCURM	.	.	93	296608	919	3080	2122	3639	5783	2524	1533	4451	1961	572	127	2798	45	0	0	4438	6396	1753	2410	2579	1981	2789	8960	5058	3853	4168	113	4274	4	2401	1202	7040	919	172	4	3339	53	3833	3404	1441	3385
.	.	.	.	VINSONII	.	.	61	78473	0	551	91	0	0	12	0	0	0	1160	2448	1005	429	0	768	0	118	0	7	0	0	0	3	3	20	82	1178	0	0	0	26	58	18	821	270	0	499	0	15	188	78
				TOTAL					919	3631	2213	3639	5783	2536	1533	4451	1961	1732	2575	3803	474	0	768	4438	6514	1753	2417	2579	1981	2789	8963	5061	3873	4250	1291	4274	4	2401	1228	7098	937	993	274	3339	552	3833	3419	1629	3463
								SAMPLE ID -->	BA-1	BA-10	BA-101	BA-123	BA-126	BA-128	BA-135	BA-152	BA-189	BA-22	BA-26	BA-3	BA-34	BA-37	BA-39	BA-4	BA-40	BA-5	BA-51	BA-59	BA-60	BA-65	BA-7	BA-73	BA-75	BA-8	BA-9	BB-113	BB-116	BB-118	BB-120	BB-122	BB-129	BB-132	BB-134	BB-136	BB-137	BB-142	BB-148	BB-150	BB-167
							R1+R2	TRIBOCURM	1837	6120	4285	7250	11471	5091	3064	9066	3914	1175	243	5525	103	0	0	8838	12693	3498	4832	5144	4159	5561	17861	10127	7711	8333	228	8553	14	4851	2439	14091	1817	348	17	6649	104	7732	6801	2954	6928
								VINSONII	0	1132	187	0	0	27	0	3	0	2367	5059	2004	915	0	1614	0	232	0	15	0	6	0	3	3	41	154	2395	0	0	0	52	123	44	1614	641	0	1085	0	29	356	160
								TOTAL	1837	7252	4472	7250	11471	5118	3064	9069	3914	3542	5302	7529	1018	0	1614	8838	12925	3498	4847	5144	4165	5561	17864	10130	7752	8487	2623	8553	14	4851	2491	14214	1861	1962	658	6649	1189	7732	6830	3310	7088
COMBINED COUNTS OF R1 and R2
SAMPLE ID	TRIBOCURM	VINSONII	TOTAL	%Tribocorum	%vinsonii	YN-tribocorum	YN-vinsonii
BA-1	1837	0	1837	100	0	POS	NEG
BA-10	6120	1132	7252	84.3905	15.6095	POS	POS
BA-101	4285	187	4472	95.8184	4.18157	POS	POS
BA-123	7250	0	7250	100	0	POS	NEG
BA-126	11471	0	11471	100	0	POS	NEG
BA-128	5091	27	5118	99.4725	0.52755	POS	POS
BA-135	3064	0	3064	100	0	POS	NEG
BA-152	9066	3	9069	99.9669	0.0330797	POS	POS
BA-189	3914	0	3914	100	0	POS	NEG
BA-22	1175	2367	3542	33.1733	66.8267	POS	POS
BA-26	243	5059	5302	4.58318	95.4168	POS	POS
BA-3	5525	2004	7529	73.3829	26.6171	POS	POS
BA-34	103	915	1018	10.1179	89.8821	POS	POS
BA-37	0	0	0	0	0	NEG	NEG
BA-39	0	1614	1614	0	100	NEG	POS
BA-4	8838	0	8838	100	0	POS	NEG
BA-40	12693	232	12925	98.205	1.79497	POS	POS
BA-5	3498	0	3498	100	0	POS	NEG
BA-51	4832	15	4847	99.6905	0.30947	POS	POS
BA-59	5144	0	5144	100	0	POS	NEG
BA-60	4159	6	4165	99.8559	0.144058	POS	POS
BA-65	5561	0	5561	100	0	POS	NEG
BA-7	17861	3	17864	99.9832	0.0167936	POS	POS
BA-73	10127	3	10130	99.9704	0.029615	POS	POS
BA-75	7711	41	7752	99.4711	0.528896	POS	POS
BA-8	8333	154	8487	98.1855	1.81454	POS	POS
BA-9	228	2395	2623	8.69234	91.3077	POS	POS
BB-113	8553	0	8553	100	0	POS	NEG
BB-116	14	0	14	100	0	POS	NEG
BB-118	4851	0	4851	100	0	POS	NEG
BB-120	2439	52	2491	97.9125	2.08752	POS	POS
BB-122	14091	123	14214	99.1347	0.865344	POS	POS
BB-129	1817	44	1861	97.6357	2.36432	POS	POS
BB-132	348	1614	1962	17.737	82.263	POS	POS
BB-134	17	641	658	2.58359	97.4164	POS	POS
BB-136	6649	0	6649	100	0	POS	NEG
BB-137	104	1085	1189	8.74685	91.2532	POS	POS
BB-142	7732	0	7732	100	0	POS	NEG
BB-148	6801	29	6830	99.5754	0.424597	POS	POS
BB-150	2954	356	3310	89.2447	10.7553	POS	POS
BB-167	6928	160	7088	97.7427	2.25734	POS	POS
BB-172	11059	1302	12361	89.4669	10.5331	POS	POS
BB-173	285	4293	4578	6.22543	93.7746	POS	POS
BB-174	747	22872	23619	3.16271	96.8373	POS	POS
BB-175	23	9865	9888	0.232605	99.7674	POS	POS
BB-176	6798	1354	8152	83.3906	16.6094	POS	POS
BB-177	4822	13355	18177	26.528	73.472	POS	POS
BB-178	22	15069	15091	0.145782	99.8542	POS	POS
BB-179	7	287	294	2.38095	97.619	POS	POS
BB-180	10	6069	6079	0.164501	99.8355	POS	POS
BB-183	5423	414	5837	92.9073	7.09268	POS	POS
BB-184	884	6574	7458	11.853	88.147	POS	POS
BB-185	403	7344	7747	5.20201	94.798	POS	POS
BB-186	22435	74	22509	99.6712	0.328757	POS	POS
BB-187	2170	7530	9700	22.3711	77.6289	POS	POS
BB-190	5401	4	5405	99.926	0.0740056	POS	POS
BB-193	1387	267	1654	83.8573	16.1427	POS	POS
BB-205	10358	1135	11493	90.1244	9.87558	POS	POS
BB-206	7015	8	7023	99.8861	0.113911	POS	POS
BB-214	11	10019	10030	0.109671	99.8903	POS	POS
BB-221	6344	0	6344	100	0	POS	NEG
BB-222	6106	0	6106	100	0	POS	NEG
BB-226	1329	7952	9281	14.3196	85.6804	POS	POS
BB-272	6010	0	6010	100	0	POS	NEG
BB-280	3519	823	4342	81.0456	18.9544	POS	POS
BB-286	5025	2	5027	99.9602	0.0397852	POS	POS
BB-289	36498	2521	39019	93.539	6.46095	POS	POS
BB-32	2110	0	2110	100	0	POS	NEG
BB-44	8763	2	8765	99.9772	0.022818	POS	POS
BB-73	5605	122	5727	97.8697	2.13026	POS	POS
BB-86	17	2532	2549	0.666928	99.3331	POS	POS
BB-96	1889	8	1897	99.5783	0.421719	POS	POS
FA-11	14	4764	4778	0.29301	99.707	POS	POS
FA-14	9301	0	9301	100	0	POS	NEG
FA-17	10409	0	10409	100	0	POS	NEG
FA-18	11828	0	11828	100	0	POS	NEG
FA-23	0	4495	4495	0	100	NEG	POS
FA-24	10300	0	10300	100	0	POS	NEG
FA-25	1863	797	2660	70.0376	29.9624	POS	POS
FA-3	4273	92	4365	97.8923	2.10767	POS	POS
FA-30	8650	267	8917	97.0057	2.99428	POS	POS
FA-31	4583	0	4583	100	0	POS	NEG
FA-32	9491	0	9491	100	0	POS	NEG
FA-37	10019	0	10019	100	0	POS	NEG
FA-4	7609	15	7624	99.8033	0.196747	POS	POS
FA-40	1903	460	2363	80.5332	19.4668	POS	POS
FA-41	7129	0	7129	100	0	POS	NEG
FA-5	12060	0	12060	100	0	POS	NEG
FA-6	7835	14	7849	99.8216	0.178367	POS	POS
FA-64	7161	0	7161	100	0	POS	NEG
FA-65	5112	0	5112	100	0	POS	NEG
FA-66	3659	15	3674	99.5917	0.408274	POS	POS
FA-67	1005	6822	7827	12.8402	87.1598	POS	POS
FA-7	5047	0	5047	100	0	POS	NEG
FA-72	3399	0	3399	100	0	POS	NEG
FA-8	77575	0	77575	100	0	POS	NEG
[truncated: 55 more columns]

## Sheet: Rat Blood PCR and Metagenomics
Sample ID	No. reads TRIBOCURM	No. reads VINSONII	TOTAL reads	%Tribocorum	%vinsonii	Rat ID	Capture Date	gltA qPCR result	gltA sequencing result
BB-1	.	.	.	.	.	1	2016-06-02	negative	.
BB-2	.	.	.	.	.	1	2016-06-10	negative	.
BB-3	.	.	.	.	.	8	2016-06-10	negative	.
BB-4	.	.	.	.	.	9	2016-06-03	negative	.
BB-5	.	.	.	.	.	13	2016-06-02	positive	B. tribocorum strainM137416, 99.41%
BB-6	.	.	.	.	.	16	2016-06-03	negative	.
BB-7	.	.	.	.	.	17	2016-06-03	negative	.
BB-8	.	.	.	.	.	18	2016-06-03	negative	.
BB-9	.	.	.	.	.	19	2016-06-04	positive	B. tribocorum strain M137416, 99.41%
BB-10	.	.	.	.	.	20	2016-06-04	negative	.
BB-11	.	.	.	.	.	22	2016-06-12	negative	.
BB-12	.	.	.	.	.	23	2016-06-05	negative	.
BB-13	.	.	.	.	.	26	2016-06-08	negative	.
BB-14	.	.	.	.	.	27	2016-06-08	negative	.
BB-15	.	.	.	.	.	28	2016-06-09	negative	.
BA-1	1837	0	1837	100	0	29	2016-08-10	positive	B. tribocorum strain BM1374166, 99.70%
BB-16	.	.	.	.	.	29	2016-06-08	negative	.
BB-17	.	.	.	.	.	32	2016-06-10	negative	.
BB-18	.	.	.	.	.	34	2016-06-09	negative	.
BB-19	.	.	.	.	.	37	2016-06-10	negative	.
BB-20	.	.	.	.	.	41	2016-06-09	negative	.
BB-21	.	.	.	.	.	45	2016-06-10	negative	.
BB-22	.	.	.	.	.	46	2016-06-10	negative	.
BB-23	.	.	.	.	.	47	2016-06-10	negative	.
BB-24	.	.	.	.	.	49	2016-06-10	negative	.
BB-25	.	.	.	.	.	51	2016-06-11	negative	.
BB-26	.	.	.	.	.	52	2016-06-11	negative	.
BB-27	.	.	.	.	.	53	2016-06-12	negative	.
BB-28	.	.	.	.	.	57	2016-06-12	negative	.
BB-29	.	.	.	.	.	91	2016-07-06	negative	.
BB-30	.	.	.	.	.	92	2016-07-06	negative	.
BB-31	.	.	.	.	.	93	2016-07-06	negative	.
BB-32	.	.	.	.	.	94	2016-07-06	negative	.
BB-33	.	.	.	.	.	95	2016-07-06	negative	.
BB-34	.	.	.	.	.	96	2016-07-06	negative	.
BB-35	.	.	.	.	.	97	2016-07-06	negative	.
BB-36	.	.	.	.	.	98	2016-07-06	negative	.
BB-37	.	.	.	.	.	98	2016-07-17	negative	.
BB-38	.	.	.	.	.	100	2016-07-06	negative	.
BB-39	.	.	.	.	.	101	2016-07-06	negative	.
BB-40	.	.	.	.	.	102	2016-07-06	negative	.
BB-41	.	.	.	.	.	103	2016-07-06	negative	.
BB-42	.	.	.	.	.	103	2016-07-15	negative	.
BB-43	.	.	.	.	.	104	2016-07-07	negative	.
BB-44	8763	2	8765	99.9772	0.022818	105	2016-07-07	positive	B. tribocorum strain BM1374166, 99.41%
BB-45	.	.	.	.	.	106	2016-07-07	negative	.
BB-46	.	.	.	.	.	107	2016-07-07	negative	.
BB-47	.	.	.	.	.	108	2016-07-08	negative	.
BB-48	.	.	.	.	.	109	2016-07-08	negative	.
BB-49	.	.	.	.	.	110	2016-07-08	negative	.
BB-50	.	.	.	.	.	111	2016-07-08	negative	.
BB-51	.	.	.	.	.	112	2016-07-08	negative	.
BB-52	.	.	.	.	.	113	2016-07-08	negative	.
BB-53	.	.	.	.	.	114	2016-07-08	negative	.
BB-54	.	.	.	.	.	115	2016-07-08	negative	.
BB-55	.	.	.	.	.	116	2016-07-08	negative	.
BB-56	.	.	.	.	.	117	2016-07-08	negative	.
BB-57	.	.	.	.	.	118	2016-07-09	negative	.
BB-58	.	.	.	.	.	119	2016-07-09	negative	.
BB-59	.	.	.	.	.	120	2016-07-09	negative	.
BB-60	.	.	.	.	.	121	2016-07-09	negative	.
BB-61	.	.	.	.	.	122	2016-07-09	negative	.
BA-12	.	.	.	.	.	123	2016-08-31	negative	.
BB-62	.	.	.	.	.	123	2016-07-09	negative	.
BB-63	.	.	.	.	.	124	2016-07-09	negative	.
BB-64	.	.	.	.	.	125	2016-07-09	negative	.
BB-65	.	.	.	.	.	126	2016-07-10	negative	.
BB-66	.	.	.	.	.	127	2016-07-10	negative	.
BB-67	.	.	.	.	.	128	2016-07-10	negative	.
BB-68	.	.	.	.	.	129	2016-07-10	negative	.
BB-69	.	.	.	.	.	130	2016-07-13	negative	.
BB-70	.	.	.	.	.	131	2016-07-13	negative	.
BA-13	.	.	.	.	.	132	2016-09-02	negative	.
BB-71	.	.	.	.	.	132	2016-07-13	negative	.
BB-72	.	.	.	.	.	133	2016-07-13	negative	.
BB-73	5605	122	5727	97.8697	2.13026	134	2016-07-13	positive	B. tribocorum strain BM1374166, 99.41%
BA-14	.	.	.	.	.	134	2016-09-02	negative	.
BB-74	.	.	.	.	.	135	2016-07-13	negative	.
BB-75	.	.	.	.	.	136	2016-07-13	negative	.
BB-76	.	.	.	.	.	137	2016-07-13	negative	.
BB-77	.	.	.	.	.	138	2016-07-13	negative	.
BB-78	.	.	.	.	.	139	2016-07-13	negative	.
BB-79	.	.	.	.	.	140	2016-07-13	negative	.
BB-80	.	.	.	.	.	141	2016-07-13	negative	.
BB-81	.	.	.	.	.	142	2016-07-14	negative	.
BB-82	.	.	.	.	.	143	2016-07-14	negative	.
BB-83	.	.	.	.	.	144	2016-07-14	negative	.
BB-84	.	.	.	.	.	145	2016-07-14	negative	.
BB-85	.	.	.	.	.	146	2016-07-14	negative	.
BB-86	17	2532	2549	0.666928	99.3331	147	2016-07-14	positive	B. vinsonii subsp Berkhoffii str Winnie 99..11%
BB-87	.	.	.	.	.	148	2016-07-14	negative	.
BB-88	.	.	.	.	.	149	2016-07-14	negative	.
BB-89	.	.	.	.	.	150	2016-07-14	negative	.
BB-90	.	.	.	.	.	151	2016-07-14	negative	.
BA-15	.	.	.	.	.	152	2016-09-12	negative	.
BB-91	.	.	.	.	.	152	2016-07-14	negative	.
BB-92	.	.	.	.	.	153	2016-07-15	negative	.
BB-93	.	.	.	.	.	154	2016-07-15	negative	.
BB-94	.	.	.	.	.	155	2016-07-15	negative	.
BB-95	.	.	.	.	.	156	2016-07-15	negative	.
BB-96	1889	8	1897	99.5783	0.421719	157	2016-07-15	positive	B. tribocorum strain BM1374166, 99.38%
BB-97	.	.	.	.	.	158	2016-07-15	negative	.
BB-98	.	.	.	.	.	159	2016-07-15	negative	.
BB-99	.	.	.	.	.	160	2016-07-15	negative	.
BB-100	.	.	.	.	.	161	2016-07-16	negative	.
BB-101	.	.	.	.	.	162	2016-07-16	negative	.
BB-102	.	.	.	.	.	163	2016-07-16	negative	.
BB-103	.	.	.	.	.	164	2016-07-16	negative	.
BB-104	.	.	.	.	.	165	2016-07-16	negative	.
BA-16	.	.	.	.	.	166	2016-09-01	negative	.
BA-17	.	.	.	.	.	167	2016-09-08	positive	B. tribocorum 100%
BB-105	.	.	.	.	.	167	2016-07-16	negative	.
BB-106	.	.	.	.	.	168	2016-07-17	negative	.
BB-107	.	.	.	.	.	169	2016-07-17	negative	.
BB-108	.	.	.	.	.	170	2016-07-17	negative	.
BB-109	.	.	.	.	.	171	2016-07-17	negative	.
BB-110	.	.	.	.	.	172	2016-07-17	negative	.
BA-18	.	.	.	.	.	181	2016-09-03	negative	.
BA-19	.	.	.	.	.	183	2016-09-11	negative	.
BA-2	.	.	.	.	.	216	2016-08-10	negative	.
BA-3	5525	2004	7529	73.3829	26.6171	217	2016-08-10	positive	B. tribocorum strain BM1374166, 99.41%
BA-4	8838	0	8838	100	0	218	2016-08-10	positive	B. tribocorum strain BM1374166, 99.41%
BA-5	3498	0	3498	100	0	218	2016-08-17	positive	B. tribocorum strain BM1374166, 99.70%
BA-6	.	.	.	.	.	219	2016-08-11	negative	.
BA-7	17861	3	17864	99.9832	0.0167936	220	2016-08-11	positive	B. tribocorum 99%
BA-8	8333	154	8487	98.1855	1.81454	221	2016-08-11	positive	B. tribocorum strain BM1374166, 99.41%
BA-9	228	2395	2623	8.69234	91.3077	222	2016-08-11	positive	B. vinsonii subsp Berkhoffii strain Winnie 97.66%
BA-10	6120	1132	7252	84.3905	15.6095	223	2016-08-17	positive	B. tribocorum strain BM1374166, 99.41%
BA-11	.	.	.	.	.	224	2016-08-21	negative	.
BA-20	.	.	.	.	.	225	2016-08-31	negative	.
BA-21	.	.	.	.	.	225	2016-09-08	negative	.
BA-22	1175	2367	3542	33.1733	66.8267	227	2016-08-31	positive	B. vinsonii subsp Berkhoffii strain Winnie 99.71
BA-23	.	.	.	.	.	228	2016-08-31	negative	.
BA-24	.	.	.	.	.	230	2016-08-31	positive	B. vinsonii subsp Berkhoffii strain Winnie 97.66%
BA-25	.	.	.	.	.	231	2016-08-31	negative	.
BA-26	243	5059	5302	4.58318	95.4168	232	2016-08-31	positive	B. vinsonii subsp Berkhoffii strain Winnie 99.00%
BA-27	.	.	.	.	.	234	2016-08-31	negative	.
BA-28	.	.	.	.	.	235	2016-08-31	negative	.
BA-29	.	.	.	.	.	236	2016-08-31	negative	.
BA-30	.	.	.	.	.	237	2016-08-31	negative	.
BA-31	.	.	.	.	.	238	2016-09-01	negative	.
BA-32	.	.	.	.	.	239	2016-09-01	positive	B. tribocorum 99.00%
BA-33	.	.	.	.	.	240	2016-09-01	negative	.
BA-34	103	915	1018	10.1179	89.8821	241	2016-09-01	positive	B. vinsonii subsp Berkhoffii strain Winnie 99.11%
BA-35	.	.	.	.	.	241	2016-09-08	negative	.
BA-36	.	.	.	.	.	242	2016-09-01	negative	.
BA-37	0	0	0	0	0	243	2016-09-01	positive	B. vinsonii subsp Berkhoffii strain Winnie 99.00%
BA-38	.	.	.	.	.	244	2016-09-01	negative	.
BA-40	12693	232	12925	98.205	1.79497	245	2016-09-12	positive	B. tribocorum 99.00%
BA-39	0	1614	1614	0	100	245	2016-09-02	positive	B. vinsonii subsp Berkhoffii strain Winnie 99.11%
BA-41	.	.	.	.	.	246	2016-09-02	negative	.
BA-42	.	.	.	.	.	247	2016-09-02	negative	.
BA-43	.	.	.	.	.	248	2016-09-02	negative	.
BA-44	.	.	.	.	.	249	2016-09-02	negative	.
BA-45	.	.	.	.	.	250	2016-09-02	positive	B. vinsonii subsp Berkhoffii strain Winnie 98.82%
BA-46	.	.	.	.	.	250	2016-09-09	negative	.
BA-47	.	.	.	.	.	251	2016-09-02	negative	.
BA-48	.	.	.	.	.	253	2016-09-02	negative	.
BA-49	.	.	.	.	.	255	2016-09-03	positive	B. vinsonii subsp Berkhoffii strain Winnie 99.00%
BA-50	.	.	.	.	.	256	2016-09-03	positive	B. vinsonii subsp Berkhoffii strain Winnie 98.00%
BA-51	4832	15	4847	99.6905	0.30947	257	2016-09-03	positive	B. tribocorum 99.41%
BA-52	.	.	.	.	.	258	2016-09-03	negative	.
BA-53	.	.	.	.	.	259	2016-09-03	negative	.
BA-54	.	.	.	.	.	260	2016-09-04	negative	.
BA-55	.	.	.	.	.	261	2016-09-04	negative	.
BA-56	.	.	.	.	.	262	2016-09-04	positive	B. vinsonii subsp Berkhoffii strain Winnie 99.11%
BA-57	.	.	.	.	.	263	2016-09-04	negative	.
BA-58	.	.	.	.	.	264	2016-09-08	negative	.
BA-59	5144	0	5144	100	0	266	2016-09-08	positive	B. tribocorum 99.41%
BA-60	4159	6	4165	99.8559	0.144058	267	2016-09-08	positive	B. tribocorum strain SD-15 99.68%
BA-61	.	.	.	.	.	268	2016-09-09	negative	.
BA-62	.	.	.	.	.	269	2016-09-09	negative	.
BA-63	.	.	.	.	.	270	2016-09-09	negative	.
BA-64	.	.	.	.	.	271	2016-09-10	negative	.
BA-65	5561	0	5561	100	0	272	2016-09-10	positive	B. tribocorum strain BM1374166, 99.70%
BA-66	.	.	.	.	.	273	2016-09-10	negative	.
BA-67	.	.	.	.	.	275	2016-09-11	negative	.
BA-68	.	.	.	.	.	276	2016-09-12	negative	.
BA-69	.	.	.	.	.	278	2016-09-12	negative	.
BA-70	.	.	.	.	.	279	2016-09-12	negative	.
BA-71	.	.	.	.	.	280	2016-09-12	negative	.
BB-111	.	.	.	.	.	281	2016-09-28	negative	.
BB-112	.	.	.	.	.	282	2016-09-28	negative	.
BB-113	8553	0	8553	100	0	283	2016-09-28	positive	B tribocorum st St 765 99.07%
BB-114	.	.	.	.	.	284	2016-09-28	negative	.
BB-115	.	.	.	.	.	285	2016-09-28	negative	.
BB-116	14	0	14	100	0	286	2016-09-28	positive	B. vinsonii subsp Berkhoffii strain Winnie 99.11%
BB-117	.	.	.	.	.	287	2016-09-28	negative	.
BB-118	4851	0	4851	100	0	288	2016-09-28	positive	B. vinsonii subsp Berkhoffii strain Winnie 99.11%
BB-119	.	.	.	.	.	289	2016-09-28	negative	.
BB-120	2439	52	2491	97.9125	2.08752	290	2016-09-29	positive	B. tribocorum strain BM1374166, 100%
BB-121	.	.	.	.	.	291	2016-09-29	negative	.
BB-122	14091	123	14214	99.1347	0.865344	292	2016-09-29	positive	B. tribocorum strain BM1374166, 99.41%
BB-123	.	.	.	.	.	293	2016-09-29	negative	.
BB-124	.	.	.	.	.	294	2016-09-29	negative	.
BB-125	.	.	.	.	.	295	2016-09-29	positive	B. tribocorum strain BM1374166, 99.41%
BB-126	.	.	.	.	.	298	2016-09-29	negative	.
BB-127	.	.	.	.	.	299	2016-09-29	negative	.
BB-128	.	.	.	.	.	302	2016-09-30	negative	.
BB-129	1817	44	1861	97.6357	2.36432	303	2016-09-30	positive	B. tribocorum strain BM1374166, 99.41%
BB-130	.	.	.	.	.	305	2016-09-30	negative	.
BB-131	.	.	.	.	.	306	2016-09-30	negative	.
BB-132	348	1614	1962	17.737	82.263	308	2016-09-30	positive	B. vinsonii subsp Berkhoffii strain Winnie 99.11%
BA-72	.	.	.	.	.	308	2016-12-12	negative	.
BB-133	.	.	.	.	.	309	2016-09-30	negative	.
BB-134	17	641	658	2.58359	97.4164	310	2016-09-30	positive	B. vinsonii subsp Berkhoffii strain Winnie 99.02%
BB-135	.	.	.	.	.	311	2016-10-01	negative	.
BB-136	6649	0	6649	100	0	312	2016-10-01	positive	B. tribocorum strain BM1374166, 99.41%
BB-137	104	1085	1189	8.74685	91.2532	313	2016-10-01	positive	B. vinsonii subsp Berkhoffii strain Winnie 98.43%
BB-138	.	.	.	.	.	314	2016-10-01	negative	.
BB-139	.	.	.	.	.	315	2016-10-01	negative	.
BB-140	.	.	.	.	.	316	2016-10-01	negative	.
BB-141	.	.	.	.	.	319	2016-10-01	negative	.
BB-142	7732	0	7732	100	0	320	2016-10-01	positive	B. tribocorum strain BM1374166, 99.41%
BB-143	.	.	.	.	.	321	2016-10-01	negative	.
BB-144	.	.	.	.	.	322	2016-10-01	negative	.
BB-145	.	.	.	.	.	323	2016-10-02	negative	.
BB-146	.	.	.	.	.	324	2016-10-02	negative	.
BB-147	.	.	.	.	.	325	2016-10-02	positive	B. vinsonii subsp Berkhoffii strain Winnie 99.11%
BB-148	6801	29	6830	99.5754	0.424597	326	2016-10-02	positive	B. tribocorum strain BM1374166, 99.41%
BB-149	.	.	.	.	.	327	2016-10-02	negative	.
BB-150	2954	356	3310	89.2447	10.7553	329	2016-10-02	positive	B. tribocorum strain BM1374166, 99.41%
BB-151	.	.	.	.	.	330	2016-10-02	negative	.
BB-152	.	.	.	.	.	331	2016-10-02	negative	.
BB-153	.	.	.	.	.	332	2016-10-02	negative	.
BB-154	.	.	.	.	.	333	2016-10-02	negative	.
BB-155	.	.	.	.	.	334	2016-10-02	negative	.
BB-156	.	.	.	.	.	335	2016-10-05	negative	.
BB-157	.	.	.	.	.	336	2016-10-05	negative	.
BB-158	.	.	.	.	.	337	2016-10-05	negative	.
BB-159	.	.	.	.	.	338	2016-10-05	negative	.
BB-160	.	.	.	.	.	339	2016-10-05	negative	.
BB-161	.	.	.	.	.	340	2016-10-05	negative	.
BB-162	.	.	.	.	.	341	2016-10-05	negative	.
BB-163	.	.	.	.	.	342	2016-10-05	negative	.
BB-164	.	.	.	.	.	343	2016-10-05	negative	.
BB-165	.	.	.	.	.	344	2016-10-05	negative	.
BB-166	.	.	.	.	.	345	2016-10-05	negative	.
BB-167	6928	160	7088	97.7427	2.25734	347	2016-10-06	positive	B. tribocorum strain BM1374166, 99.41%
BB-168	.	.	.	.	.	348	2016-10-06	negative	.
BB-169	.	.	.	.	.	349	2016-10-06	negative	.
BB-170	.	.	.	.	.	350	2016-10-06	negative	.
BB-171	.	.	.	.	.	351	2016-10-06	positive	B. vinsonii subsp Berkhoffii strain Winnie 99.11%
BB-172	11059	1302	12361	89.4669	10.5331	352	2016-10-06	positive	B. tribocorum strain BM1374166, 99.41%
BB-173	285	4293	4578	6.22543	93.7746	353	2016-10-06	positive	B. vinsonii subsp Berkhoffii strain Winnie 98.53%
BB-174	.	.	.	.	.	354	2016-10-06	negative	.
BB-175	23	9865	9888	0.232605	99.7674	356	2016-10-07	positive	B. vinsonii subsp Berkhoffii strain Winnie 98.11%
BB-176	6798	1354	8152	83.3906	16.6094	357	2016-10-07	positive	B. tribocorum strain BM1374166, 99.41%
BB-177	4822	13355	18177	26.528	73.472	358	2016-10-07	positive	B. vinsonii subsp Berkhoffii strain Winnie 99.11%
BB-178	22	15069	15091	0.145782	99.8542	359	2016-10-07	positive	B. vinsonii subsp Berkhoffii strain Winnie 99.11%
BB-179	7	287	294	2.38095	97.619	360	2016-10-07	positive	B. vinsonii subsp Berkhoffii strain Winnie 99.11%
BB-180	10	6069	6079	0.164501	99.8355	361	2016-10-07	positive	B. vinsonii subsp Berkhoffii strain Winnie 99.11%
BB-181	.	.	.	.	.	362	2016-10-07	negative	.
BB-182	.	.	.	.	.	363	2016-10-07	negative	.
BB-183	5423	414	5837	92.9073	7.09268	364	2016-10-07	positive	B. tribocorum strain BM1374166, 100%
BB-184	884	6574	7458	11.853	88.147	365	2016-10-07	positive	B. vinsonii subsp Berkhoffii strain Winnie 98.22%
BB-185	403	7344	7747	5.20201	94.798	366	2016-10-07	positive	B. vinsonii subsp Berkhoffii strain Winnie 99%
BB-186	22435	74	22509	99.6712	0.328757	367	2016-10-07	positive	B. vinsonii subsp Berkhoffii strain Winnie 98.99%
BB-187	2170	7530	9700	22.3711	77.6289	368	2016-10-07	positive	B. tribocorum strain BM1374166, 100%
BB-188	.	.	.	.	.	370	2016-10-08	positive	B. vinsonii subsp Berkhoffii strain Winnie 98.98%
BB-189	.	.	.	.	.	371	2016-10-08	negative	.
BB-190	5401	4	5405	99.926	0.0740056	372	2016-10-08	positive	B. vinsonii subsp Berkhoffii strain Winnie 98.96%
BB-191	.	.	.	.	.	373	2016-10-08	negative	.
BB-192	.	.	.	.	.	374	2016-10-08	negative	.
BB-193	1387	267	1654	83.8573	16.1427	376	2016-10-08	positive	B. tribocorum strain SD-97.63%
BB-194	.	.	.	.	.	377	2016-10-08	negative	.
BB-195	.	.	.	.	.	378	2016-10-08	negative	.
BB-196	.	.	.	.	.	379	2016-10-08	negative	.
BB-197	.	.	.	.	.	380	2016-10-09	negative	.
BB-198	.	.	.	.	.	381	2016-10-09	positive	Sequencing failed
BB-199	.	.	.	.	.	382	2016-10-09	negative	.
BB-200	.	.	.	.	.	383	2016-10-09	negative	.
BB-201	.	.	.	.	.	384	2016-10-09	negative	.
BB-202	.	.	.	.	.	386	2016-10-09	negative	.
BB-203	.	.	.	.	.	387	2016-10-09	negative	.
BB-204	.	.	.	.	.	388	2016-10-09	negative	.
BB-205	10358	1135	11493	90.1244	9.87558	389	2016-10-09	positive	B. tribocorum strain SD-99.68%
BB-206	7015	8	7023	99.8861	0.113911	390	2016-10-09	positive	B. tribocorum Bt 765 100%
BB-207	.	.	.	.	.	391	2016-10-09	negative	.
BB-208	.	.	.	.	.	392	2016-10-09	negative	.
BA-73	10127	3	10130	99.9704	0.029615	410	2016-12-08	positive	B. tribocorum strain BM1374166, 99.71%
BB-209	.	.	.	.	.	480	2016-11-02	negative	.
BB-210	.	.	.	.	.	480	2016-11-10	negative	.
BB-211	.	.	.	.	.	481	2016-11-02	negative	.
BB-212	.	.	.	.	.	481	2016-11-10	negative	.
BB-213	.	.	.	.	.	483	2016-11-02	negative	.
BB-214	11	10019	10030	0.109671	99.8903	484	2016-11-02	positive	B. vinsonii subsp Berkhoffii strain Winnie 99.02%
BB-215	.	.	.	.	.	485	2016-11-02	negative	.
BB-216	.	.	.	.	.	486	2016-11-02	negative	.
BB-217	.	.	.	.	.	486	2016-11-09	negative	.
BB-218	.	.	.	.	.	487	2016-11-02	negative	.
BB-219	.	.	.	.	.	488	2016-11-02	negative	.
BB-220	.	.	.	.	.	491	2016-11-02	negative	.
BB-221	6344	0	6344	100	0	492	2016-11-03	positive	B. tribocorum strain SD-15 99.7%
BB-222	6106	0	6106	100	0	492	2016-11-10	positive	B. tribocorum strain SD-15 99.7%
BB-223	.	.	.	.	.	493	2016-11-03	negative	.
BB-224	.	.	.	.	.	494	2016-11-03	negative	.
BB-225	.	.	.	.	.	495	2016-11-03	negative	.
BB-226	1329	7952	9281	14.3196	85.6804	496	2016-11-03	positive	B. vinsonii subsp Berkhoffii strain Winnie 99.01%
BB-227	.	.	.	.	.	497	2016-11-03	negative	.
BB-228	.	.	.	.	.	498	2016-11-03	negative	.
BB-229	.	.	.	.	.	499	2016-11-03	negative	.
BB-230	.	.	.	.	.	500	2016-11-03	negative	.
BB-231	.	.	.	.	.	501	2016-11-03	negative	.
BB-232	.	.	.	.	.	502	2016-11-03	negative	.
BB-233	.	.	.	.	.	503	2016-11-03	negative	.
BB-234	.	.	.	.	.	504	2016-11-04	negative	.
BB-235	.	.	.	.	.	505	2016-11-04	negative	.
BB-236	.	.	.	.	.	506	2016-11-04	negative	.
BB-237	.	.	.	.	.	507	2016-11-04	negative	.
BB-238	.	.	.	.	.	508	2016-11-04	negative	.
BB-239	.	.	.	.	.	509	2016-11-04	negative	.
BB-240	.	.	.	.	.	510	2016-11-04	positive	B. vinsonii subsp Berkhoffii strain Winnie 99.03%
BB-241	.	.	.	.	.	512	2016-11-05	negative	.
BB-242	.	.	.	.	.	513	2016-11-05	positive	B. vinsonii subsp Berkhoffii strain Winnie 99.03%
BB-243	.	.	.	.	.	514	2016-11-05	negative	.
BB-244	.	.	.	.	.	515	2016-11-05	positive	B. vinsonii subsp Berkhoffii strain Winnie 98.18%
BB-245	.	.	.	.	.	516	2016-11-05	negative	.
BB-246	.	.	.	.	.	517	2016-11-05	positive	B. vinsonii subsp Berkhoffii strain Winnie 98.48%
BB-247	.	.	.	.	.	518	2016-11-05	positive	B. vinsonii subsp Berkhoffii strain Winnie 98.77%
BB-248	.	.	.	.	.	519	2016-11-05	positive	B. vinsonii subsp Berkhoffii strain Winnie 99.06%
BB-249	.	.	.	.	.	520	2016-11-05	negative	.
BB-250	.	.	.	.	.	524	2016-11-06	negative	.
BB-251	.	.	.	.	.	525	2016-11-06	negative	.
BB-252	.	.	.	.	.	526	2016-11-09	negative	.
BB-253	.	.	.	.	.	527	2016-11-09	negative	.
BB-254	.	.	.	.	.	528	2016-11-09	negative	.
BB-255	.	.	.	.	.	529	2016-11-09	positive	mixture
BB-256	.	.	.	.	.	530	2016-11-09	positive	B. vinsonii subsp Berkhoffii strain Winnie 98.16%
BB-257	.	.	.	.	.	531	2016-11-09	positive	B. tribocorum strain SD-15 99.67%
BB-258	.	.	.	.	.	532	2016-11-09	negative	.
BB-259	.	.	.	.	.	533	2016-11-09	negative	.
BB-260	.	.	.	.	.	534	2016-11-09	negative	.
BB-261	.	.	.	.	.	535	2016-11-09	negative	.
BB-262	.	.	.	.	.	536	2016-11-09	positive	B. tribocorum strain 765 100%
BB-263	.	.	.	.	.	537	2016-11-09	negative	.
BB-264	.	.	.	.	.	538	2016-11-10	negative	.
BB-265	.	.	.	.	.	539	2016-11-10	negative	.
BB-266	.	.	.	.	.	540	2016-11-10	negative	.
BB-267	.	.	.	.	.	541	2016-11-10	positive	B. vinsonii subsp Berkhoffii strain Winnie 99.02%
BB-268	.	.	.	.	.	542	2016-11-10	positive	B. tribocorum strain 765 100%
BB-269	.	.	.	.	.	543	2016-11-10	positive	B. tribocorum strain 765 100%
BB-270	.	.	.	.	.	544	2016-11-10	positive	B. vinsonii subsp Berkhoffii strain Winnie 99.01%
BB-271	.	.	.	.	.	545	2016-11-11	negative	.
BB-272	6010	0	6010	100	0	546	2016-11-11	positive	B. tribocorum strain Bt 765,100%
BB-273	.	.	.	.	.	547	2016-11-11	missing sample	.
BB-274	.	.	.	.	.	548	2016-11-11	negative	.
BB-275	.	.	.	.	.	550	2016-11-11	negative	.
BB-276	.	.	.	.	.	551	2016-11-11	negative	.
BB-277	.	.	.	.	.	552	2016-11-11	negative	.
BB-278	.	.	.	.	.	553	2016-11-12	negative	.
BB-279	.	.	.	.	.	554	2016-11-12	negative	.
BB-280	3519	823	4342	81.0456	18.9544	555	2016-11-12	positive	B. tribocorum strain Bt 765,100%
BB-281	.	.	.	.	.	556	2016-11-12	negative	.
BB-282	.	.	.	.	.	557	2016-11-12	negative	.
BB-283	.	.	.	.	.	558	2016-11-12	negative	.
BB-284	.	.	.	.	.	559	2016-11-13	negative	.
BB-285	.	.	.	.	.	560	2016-11-13	negative	.
BB-286	5025	2	5027	99.9602	0.0397852	561	2016-11-13	positive	B. tribocorum strain Bt 765, 99.66%
BB-287	.	.	.	.	.	562	2016-11-13	negative	.
BB-288	.	.	.	.	.	563	2016-11-13	negative	.
BB-289	36498	2521	39019	93.539	6.46095	565	2016-11-13	positive	B. tribocorum strain Bt 765,100%
BB-290	.	.	.	.	.	566	2016-11-13	negative	.
BB-291	.	.	.	.	.	567	2016-11-13	negative	.
BB-292	.	.	.	.	.	568	2016-11-13	negative	.
BA-75	7711	41	7752	99.4711	0.528896	638	2016-12-15	positive	B. tribocorum 99.00%
BA-74	.	.	.	.	.	638	2016-12-07	negative	.
BA-76	.	.	.	.	.	641	2016-12-07	negative	.
BA-77	.	.	.	.	.	642	2016-12-07	negative	.
BA-78	.	.	.	.	.	643	2016-12-07	negative	.
BA-79	.	.	.	.	.	644	2016-12-07	negative	.
BA-80	.	.	.	.	.	644	2016-12-14	negative	.
BA-81	.	.	.	.	.	645	2016-12-07	negative	.
BA-82	.	.	.	.	.	646	2016-12-07	negative	.
BA-83	.	.	.	.	.	647	2016-12-07	negative	.
BA-84	.	.	.	.	.	648	2016-12-07	negative	.
BA-85	.	.	.	.	.	649	2016-12-07	negative	.
BA-86	.	.	.	.	.	651	2016-12-08	negative	.
BA-87	.	.	.	.	.	653	2016-12-08	negative	.
BA-88	.	.	.	.	.	654	2016-12-08	negative	.
BA-89	.	.	.	.	.	655	2016-12-08	negative	.
BA-90	.	.	.	.	.	656	2016-12-08	negative	.
BA-91	.	.	.	.	.	657	2016-12-08	negative	.
BA-92	.	.	.	.	.	658	2016-12-08	negative	.
BA-93	.	.	.	.	.	659	2016-12-08	negative	.
BA-94	.	.	.	.	.	660	2016-12-08	negative	.
BA-95	.	.	.	.	.	661	2016-12-08	negative	.
BA-96	.	.	.	.	.	662	2016-12-08	negative	.
BA-97	.	.	.	.	.	663	2016-12-08	negative	.
BA-98	.	.	.	.	.	664	2016-12-08	negative	.
BA-99	.	.	.	.	.	665	2016-12-12	negative	.
BA-100	.	.	.	.	.	666	2016-12-12	negative	.
BA-101	4285	187	4472	95.8184	4.18157	667	2016-12-12	positive	B. tribocorum 99.00%
BA-102	.	.	.	.	.	668	2016-12-12	negative	.
BA-103	.	.	.	.	.	669	2016-12-12	negative	.
BA-104	.	.	.	.	.	670	2016-12-12	negative	.
BA-105	.	.	.	.	.	671	2016-12-12	negative	.
BA-106	.	.	.	.	.	672	2016-12-12	negative	.
BA-107	.	.	.	.	.	673	2016-12-12	negative	.
BA-108	.	.	.	.	.	674	2016-12-12	negative	.
BA-109	.	.	.	.	.	675	2016-12-12	negative	.
BA-110	.	.	.	.	.	676	2016-12-12	negative	.
BA-111	.	.	.	.	.	677	2016-12-12	negative	.
BA-112	.	.	.	.	.	678	2016-12-13	negative	.
BA-113	.	.	.	.	.	679	2016-12-13	negative	.
BA-114	.	.	.	.	.	680	2016-12-13	negative	.
BA-115	.	.	.	.	.	681	2016-12-13	negative	.
BA-116	.	.	.	.	.	682	2016-12-13	negative	.
BA-117	.	.	.	.	.	683	2016-12-13	negative	.
BA-118	.	.	.	.	.	684	2016-12-13	negative	.
BA-119	.	.	.	.	.	685	2016-12-13	negative	.
BA-120	.	.	.	.	.	686	2016-12-14	negative	.
BA-121	.	.	.	.	.	687	2016-12-14	negative	.
BA-122	.	.	.	.	.	688	2016-12-14	negative	.
BA-123	7250	0	7250	100	0	689	2016-12-14	positive	B. tribocorum st BT 765 99.33%
BA-124	.	.	.	.	.	690	2016-12-14	negative	.
BA-125	.	.	.	.	.	691	2016-12-14	negative	.
BA-126	11471	0	11471	100	0	692	2016-12-14	positive	B. tribocorum st BT 765 99.33%
BA-127	.	.	.	.	.	693	2016-12-14	negative	.
BA-128	5091	27	5118	99.4725	0.52755	694	2016-12-14	positive	B. tribocorum st BT 765 100%
BA-129	.	.	.	.	.	695	2016-12-14	negative	.
BA-130	.	.	.	.	.	697	2016-12-15	negative	.
BA-131	.	.	.	.	.	698	2016-12-15	negative	.
BA-132	.	.	.	.	.	699	2016-12-15	negative	.
BA-133	.	.	.	.	.	700	2016-12-15	negative	.
BA-134	.	.	.	.	.	702	2016-12-15	negative	.
BA-135	3064	0	3064	100	0	703	2016-12-16	positive	B. tribocorum st BT 765 100%
BA-136	.	.	.	.	.	704	2016-12-16	negative	.
BA-137	.	.	.	.	.	705	2016-12-16	negative	.
BA-138	.	.	.	.	.	706	2016-12-16	negative	.
BA-139	.	.	.	.	.	707	2016-12-16	negative	.
BA-140	.	.	.	.	.	708	2016-12-16	negative	.
BA-141	.	.	.	.	.	709	2016-12-16	negative	.
BA-142	.	.	.	.	.	710	2016-12-16	negative	.
BA-143	.	.	.	.	.	711	2016-12-16	negative	.
BA-144	.	.	.	.	.	712	2016-12-16	negative	.
BA-145	.	.	.	.	.	713	2016-12-16	negative	.
BA-146	.	.	.	.	.	714	2016-12-17	negative	.
BA-147	.	.	.	.	.	715	2016-12-17	negative	.
BA-148	.	.	.	.	.	716	2016-12-17	negative	.
BA-149	.	.	.	.	.	717	2016-12-18	negative	.
BA-150	.	.	.	.	.	718	2016-12-18	negative	.
BA-151	.	.	.	.	.	719	2016-12-18	negative	.
BA-153	.	.	.	.	.	720	2016-12-28	negative	.
BA-154	.	.	.	.	.	721	2016-12-28	negative	.
BA-155	.	.	.	.	.	722	2016-12-28	negative	.
BA-156	.	.	.	.	.	723	2016-12-28	negative	.
BA-157	.	.	.	.	.	724	2016-12-28	negative	.
BA-158	.	.	.	.	.	725	2016-12-28	negative	.
BA-159	.	.	.	.	.	726	2016-12-29	negative	.
BA-160	.	.	.	.	.	727	2016-12-29	negative	.
BA-161	.	.	.	.	.	728	2016-12-29	negative	.
BA-162	.	.	.	.	.	729	2016-12-29	negative	.
BA-163	.	.	.	.	.	730	2016-12-29	negative	.
BA-164	.	.	.	.	.	731	2016-12-29	negative	.
BA-165	.	.	.	.	.	732	2016-12-30	negative	.
BA-166	.	.	.	.	.	733	2016-12-30	negative	.
BA-167	.	.	.	.	.	734	2016-12-30	negative	.
BA-168	.	.	.	.	.	735	2016-12-30	negative	.
BA-169	.	.	.	.	.	736	2016-12-31	negative	.
BA-170	.	.	.	.	.	737	2016-12-31	negative	.
BA-171	.	.	.	.	.	738	2016-12-31	negative	.
BA-172	.	.	.	.	.	739	2016-12-31	negative	.
BA-173	.	.	.	.	.	739	2017-01-08	negative	.
BA-174	.	.	.	.	.	740	2017-01-01	negative	.
BA-175	.	.	.	.	.	741	2017-01-01	negative	.
BA-176	.	.	.	.	.	742	2017-01-01	negative	.
BA-177	.	.	.	.	.	743	2017-01-01	negative	.
BA-178	.	.	.	.	.	744	2017-01-01	negative	.
BA-179	.	.	.	.	.	745	2017-01-01	negative	.
BA-180	.	.	.	.	.	746	2017-01-01	negative	.
BA-181	.	.	.	.	.	747	2017-01-01	negative	.
BA-182	.	.	.	.	.	748	2017-01-01	negative	.
BA-183	.	.	.	.	.	749	2017-01-01	negative	.
BA-184	.	.	.	.	.	750	2017-01-01	negative	.
BA-185	.	.	.	.	.	751	2017-01-01	negative	.
BA-186	.	.	.	.	.	752	2017-01-01	negative	.
BA-187	.	.	.	.	.	753	2017-01-04	negative	.
BA-188	.	.	.	.	.	754	2017-01-04	negative	.
BA-189	3914	0	3914	100	0	755	2017-01-04	positive	B. tribocorum strain BM1374166, 99.41%
BA-190	.	.	.	.	.	756	2017-01-04	negative	.
BA-191	.	.	.	.	.	757	2017-01-04	negative	.
BA-192	.	.	.	.	.	758	2017-01-04	negative	.
BA-193	.	.	.	.	.	759	2017-01-04	negative	.
BA-194	.	.	.	.	.	760	2017-01-05	negative	.
BA-195	.	.	.	.	.	761	2017-01-05	negative	.
BA-196	.	.	.	.	.	762	2017-01-05	negative	.
BA-197	.	.	.	.	.	763	2017-01-05	negative	.
BA-198	.	.	.	.	.	764	2017-01-05	negative	.
BA-199	.	.	.	.	.	766	2017-01-06	negative	.
BA-200	.	.	.	.	.	767	2017-01-06	negative	.
BA-201	.	.	.	.	.	768	2017-01-06	negative	.
BA-202	.	.	.	.	.	769	2017-01-06	negative	.
BA-203	.	.	.	.	.	771	2017-01-07	negative	.
BA-204	.	.	.	.	.	773	2017-01-07	negative	.
BA-205	.	.	.	.	.	774	2017-01-07	negative	.
BA-206	.	.	.	.	.	775	2017-01-07	negative	.
BA-207	.	.	.	.	.	776	2017-01-07	negative	.
BA-208	.	.	.	.	.	777	2017-01-07	negative	.
BA-209	.	.	.	.	.	778	2017-01-08	negative	.
BA-210	.	.	.	.	.	779	2017-01-08	negative	.
BA-152	9066	3	9069	99.9669	0.0330797	497 or 499	2016-12-29	positive	B. tribocorum strain BM1374166, 99.41%

## Sheet: Fleas PCR and Metagenomics
Sample ID	No. reads TRIBOCURM	No. reads VINSONII	TOTAL reads	%Tribocorum	%vinsonii	Rat ID	Capture Date	gltA qPCR result	ssrA PCR result	SSRA sequencing result
FA-03	4273	92	4365	97.8923	2.10767	217	2016-08-10	positive	positive	B.tribocorum strain GDHL73; 100%
FA-04	7609	15	7624	99.8033	0.196747	218	2016-08-10	positive	positive	B.tribocorum strain GDHL73; 100%
FA-05	12060	0	12060	100	0	218	2016-08-17	positive	positive	B.tribocorum strain GDHL73; 100%
FA-06	7835	14	7849	99.8216	0.178367	219	2016-08-11	positive	positive	B.tribocorum strain GDHL73; 100%
FA-07	5047	0	5047	100	0	220	2016-08-11	positive	positive	B.tribocorum strain GDHL73; 100%
FA-08	77575	0	77575	100	0	223	2016-08-17	positive	positive	B.tribocorum strain GDHL73; 100%
FA-14	9301	0	9301	100	0	240	2016-09-01	positive	positive	B.tribocorum strain GDHL73; 100%
FA-17	10409	0	10409	100	0	132	2016-09-02	positive	positive	B.tribocorum strain GDHL73; 100%
FA-18	11828	0	11828	100	0	134	2016-09-02	positive	positive	B.tribocorum strain GDHL73; 100%
FA-24	10300	0	10300	100	0	225	2016-09-08	positive	positive	B.tribocorum strain GDHL73; 100%
FA-25	1863	797	2660	70.0376	29.9624	267	2016-09-08	positive	positive	B.tribocorum strain GDHL73; 100%
FA-30	8650	267	8917	97.0057	2.99428	245	2016-09-12	positive	positive	B.tribocorum strain GDHL73; 100%
FA-31	4583	0	4583	100	0	638	2016-12-07	positive	positive	B. tribocorum starin GDHL73; 100%
FA-32	9491	0	9491	100	0	641	2016-12-07	positive	positive	B. tribocorum starin GDHL73; 100%
FA-37	10019	0	10019	100	0	655	2016-12-08	positive	positive	B. tribocorum starin GDHL73; 100%
FA-40	1903	460	2363	80.5332	19.4668	664	2016-12-08	positive	positive	B. tribocorum starin GDHL73; 100%
FA-41	7129	0	7129	100	0	667	2016-12-12	positive	positive	B. tribocorum starin GDHL73; 100%
FA-52	.	.	.	.	.	694	2016-12-14	positive	positive	B. tribocorum starin GDHL73; 100%
FA-54	.	.	.	.	.	704	2016-12-16	positive	positive	b. tribocorum starin GDHL73; 100%
FA-58	.	.	.	.	.	717	2016-12-18	positive	positive	B. tribocorum starin GDHL73; 100%
FA-62	.	.	.	.	.	734	2016-12-30	positive	positive	B. tribocorum strain GDHL 73; 100%
FA-63	.	.	.	.	.	735	2016-12-30	positive	positive	B. tribocorum strain GDHL 73; 100%
FA-64	7161	0	7161	100	0	738	2016-12-31	positive	positive	B. tribocorum strain GDHL 73; 100%
FA-65	5112	0	5112	100	0	748	2017-01-01	positive	positive	B. tribocorum strain GDHL 73; 100%
FA-72	3399	0	3399	100	0	.	.	positive	positive	B. tribocorum strain GDHL 73; 100%
FB-100	.	.	.	.	.	391	2016-10-09	positive	positive	B. tribocorum starin GDHL73; 100%
FB-111	.	.	.	.	.	500	2016-11-03	positive	positive	B. tribocorum starin GDHL73; 100%
FB-122	.	.	.	.	.	520	2016-11-05	positive	positive	B. tribocorum strain GDHL 73; 98%
FB-127	.	.	.	.	.	527	2016-11-09	positive	positive	B. tribocorum strain GDHL 73; 100%
FB-134	.	.	.	.	.	542	2016-11-10	positive	positive	B. tribocorum strain GDHL 73; 100%
FB-135	.	.	.	.	.	544	2016-11-10	positive	positive	B. tribocorum strain GDHL 73; 100%
FB-136	.	.	.	.	.	546	2016-11-11	positive	positive	B. tribocorum strain GDHL 73; 100%
FB-44	.	.	.	.	.	134	2016-07-13	positive	positive	B.tribocorum strain GDHL73; 100%
FB-47	.	.	.	.	.	137	2016-07-13	positive	positive	B.tribocorum strain GDHL73; 100%
FB-53	.	.	.	.	.	149	2016-07-14	positive	positive	B.tribocorum strain GDHL73; 100%
FB-57	.	.	.	.	.	159	2016-07-15	positive	positive	B.tribocorum strain GDHL73; 100%
FB-58	.	.	.	.	.	160	2016-07-15	positive	positive	B.tribocorum strain GDHL73; 100%
FB-63	.	.	.	.	.	283	2016-09-28	positive	positive	B.tribocorum strain GDHL73; 100%
FB-64	.	.	.	.	.	298	2016-09-19	positive	positive	B.tribocorum strain GDHL73; 100%
FB-65	.	.	.	.	.	303	2016-09-30	positive	positive	B.tribocorum strain GDHL73; 100%
FB-66	.	.	.	.	.	310	2016-09-30	positive	positive	B.tribocorum strain GDHL73; 100%
FB-68	.	.	.	.	.	312	2016-10-01	positive	positive	B.tribocorum strain GDHL73; 100%
FB-71	.	.	.	.	.	320	2016-10-01	positive	positive	B.tribocorum strain GDHL73; 100%
FB-72	.	.	.	.	.	322	2016-10-01	positive	positive	B.tribocorum strain GDHL73; 100%
FB-73	.	.	.	.	.	323	2016-10-02	positive	positive	B.tribocorum strain GDHL73; 100%
FB-75	.	.	.	.	.	329	2016-10-02	positive	positive	B.tribocorum strain GDHL73; 100%
FA-11	14	4764	4778	0.29301	99.707	230	2016-08-31	positive	negative	.
FA-23	0	4495	4495	0	100	167	2016-09-08	positive	negative	.
FA-66	3659	15	3674	99.5917	0.408274	749	2017-01-01	positive	negative	.
FA-67	1005	6822	7827	12.8402	87.1598	752	2017-01-01	positive	negative	.
FB-102	.	.	.	.	.	480	2016-11-02	positive	negative	.
FB-104	.	.	.	.	.	483	2016-11-02	positive	negative	.
FB-106	.	.	.	.	.	485	2016-11-02	positive	negative	.
FB-108	.	.	.	.	.	488	2016-11-02	positive	negative	.
FB-110	.	.	.	.	.	499	2016-11-03	positive	negative	.
FB-112	.	.	.	.	.	501	2016-11-03	positive	negative	.
FB-116	.	.	.	.	.	507	2016-11-04	positive	negative	.
FB-118	.	.	.	.	.	510	2016-11-04	positive	negative	.
FB-120	.	.	.	.	.	514	2016-11-05	positive	negative	.
FB-128	.	.	.	.	.	532	2016-11-09	positive	negative	.
FB-129	.	.	.	.	.	533	2016-11-09	positive	negative	.
FB-130	.	.	.	.	.	537	2016-11-09	positive	negative	.
FB-131	.	.	.	.	.	538	2016-11-10	positive	negative	.
FB-133	.	.	.	.	.	540	2016-11-10	positive	negative	.
FB-138	.	.	.	.	.	552	2016-11-11	positive	negative	.
FB-139	.	.	.	.	.	555	2016-11-12	positive	negative	.
FB-67	.	.	.	.	.	311	2016-10-01	positive	negative	.
FB-70	.	.	.	.	.	319	2016-10-01	positive	negative	.
FB-74	.	.	.	.	.	327	2016-10-02	positive	negative	.
FB-97	.	.	.	.	.	384	2016-10-09	positive	negative	.
FA-48	.	.	.	.	.	644	2016-12-14	negative	positive	B. tribocorum starin GDHL73; 100%
FB-123	.	.	.	.	.	523	2016-11-06	negative	positive	B. tribocorum strain GDHL 73; 100%
FB-39	.	.	.	.	.	122	2016-07-09	negative	positive	B.tribocorum strain GDHL73; 100%
FB-49	.	.	.	.	.	143	2016-07-14	negative	positive	B.tribocorum strain GDHL73; 100%
FB-56	.	.	.	.	.	156	2016-07-15	negative	positive	B.tribocorum strain GDHL73; 100%
FA-01	.	.	.	.	.	29	2016-08-10	negative	negative	.
FA-02	.	.	.	.	.	216	2016-08-10	negative	negative	.
FA-10	.	.	.	.	.	226	2016-08-31	negative	negative	.
FA-12	.	.	.	.	.	232	2016-08-31	negative	negative	.
FA-13	.	.	.	.	.	235	2016-08-31	negative	negative	.
FA-15	.	.	.	.	.	241	2016-09-01	negative	negative	.
FA-16	.	.	.	.	.	243	2016-09-01	negative	negative	.
FA-19	.	.	.	.	.	252	2016-09-02	negative	negative	.
FA-20	.	.	.	.	.	253	2016-09-02	negative	negative	.
FA-21	.	.	.	.	.	260	2016-09-04	negative	negative	.
FA-22	.	.	.	.	.	262	2016-09-04	negative	negative	.
FA-26	.	.	.	.	.	269	2016-09-09	negative	negative	.
FA-27	.	.	.	.	.	270	2016-09-09	negative	negative	.
FA-29	.	.	.	.	.	152	2016-09-12	negative	negative	.
FA-33	.	.	.	.	.	644	2016-12-07	negative	negative	.
FA-34	.	.	.	.	.	646	2016-12-07	negative	negative	.
FA-35	.	.	.	.	.	647	2016-12-07	negative	negative	.
FA-36	.	.	.	.	.	410	2016-12-08	negative	negative	.
FA-38	.	.	.	.	.	656	2016-12-08	negative	negative	.
FA-39	.	.	.	.	.	657	2016-12-08	negative	negative	.
FA-42	.	.	.	.	.	669	2016-12-12	negative	negative	.
FA-43	.	.	.	.	.	670	2016-12-12	negative	negative	.
FA-44	.	.	.	.	.	671	2016-12-12	negative	negative	.
FA-45	.	.	.	.	.	672	2016-12-12	negative	negative	.
FA-46	.	.	.	.	.	673	2016-12-12	negative	negative	.
FA-47	.	.	.	.	.	684	2016-12-13	negative	negative	.
FA-49	.	.	.	.	.	686	2016-12-14	negative	negative	.
FA-50	.	.	.	.	.	687	2016-12-14	negative	negative	.
FA-51	.	.	.	.	.	688	2016-12-14	negative	negative	.
FA-53	.	.	.	.	.	699	2016-12-15	negative	negative	.
FA-55	.	.	.	.	.	714	2016-12-17	negative	negative	.
FA-56	.	.	.	.	.	715	2016-12-17	negative	negative	.
FA-57	.	.	.	.	.	716	2016-12-17	negative	negative	.
FA-60	.	.	.	.	.	731	2016-12-29	negative	negative	.
FA-61	.	.	.	.	.	732	2016-12-30	negative	negative	.
FA-68	.	.	.	.	.	753	2017-01-04	negative	negative	.
FA-69	.	.	.	.	.	762	2017-01-05	negative	negative	.
FA-70	.	.	.	.	.	764	2017-01-05	negative	negative	.
FA-71	.	.	.	.	.	774	2017-01-07	negative	negative	.
FA-73	.	.	.	.	.	.	.	negative	negative	.
FB-101	.	.	.	.	.	392	2016-10-09	negative	negative	.
FB-103	.	.	.	.	.	481	2016-11-02	negative	negative	.
FB-107	.	.	.	.	.	487	2016-11-02	negative	negative	.
FB-109	.	.	.	.	.	498	2016-11-03	negative	negative	.
FB-113	.	.	.	.	.	502	2016-11-03	negative	negative	.
FB-114	.	.	.	.	.	503	2016-11-03	negative	negative	.
FB-115	.	.	.	.	.	504	2016-11-04	negative	negative	.
FB-121	.	.	.	.	.	516	2016-11-05	negative	negative	.
FB-124	.	.	.	.	.	524	2016-11-06	negative	negative	.
FB-125	.	.	.	.	.	486	2016-11-09	negative	negative	.
FB-126	.	.	.	.	.	526	2016-11-09	negative	negative	.
FB-137	.	.	.	.	.	549	2016-11-11	negative	negative	.
FB-40	.	.	.	.	.	127	2016-07-10	negative	negative	.
FB-41	.	.	.	.	.	128	2016-07-10	negative	negative	.
FB-42	.	.	.	.	.	129	2016-07-10	negative	negative	.
FB-43	.	.	.	.	.	130	2016-07-13	negative	negative	.
FB-45	.	.	.	.	.	135	2016-07-13	negative	negative	.
FB-46	.	.	.	.	.	136	2016-07-13	negative	negative	.
FB-48	.	.	.	.	.	140	2016-07-13	negative	negative	.
FB-50	.	.	.	.	.	144	2016-07-14	negative	negative	.
FB-51	.	.	.	.	.	146	2016-07-14	negative	negative	.
FB-52	.	.	.	.	.	147	2016-07-14	negative	negative	.
FB-54	.	.	.	.	.	151	2016-07-14	negative	negative	.
FB-55	.	.	.	.	.	153	2016-07-15	negative	negative	.
FB-59	.	.	.	.	.	161	2016-07-16	negative	negative	.
FB-60	.	.	.	.	.	165	2016-07-16	negative	negative	.
FB-61	.	.	.	.	.	98	2016-07-17	negative	negative	.
FB-62	.	.	.	.	.	282	2016-09-28	negative	negative	.
FB-99	.	.	.	.	.	389	2016-10-09	negative	negative	.
FA-09	.	.	.	.	.	224	2016-08-21	missing	missing	.
FA-28	.	.	.	.	.	278	2016-09-12	missing	missing	.
FA-59	.	.	.	.	.	725	2016-12-28	missing	missing	.
FB-105	.	.	.	.	.	484	2016-11-02	missing	missing	.
FB-117	.	.	.	.	.	508	2016-11-04	missing	missing	.
FB-119	.	.	.	.	.	513	2016-11-05	missing	missing	.
FB-12	.	.	.	.	.	37	2016-06-10	missing	missing	.
FB-132	.	.	.	.	.	539	2016-11-10	missing	missing	.
FB-15	.	.	.	.	.	14	2016-06-12	missing	missing	.
FB-28	.	.	.	.	.	98	2016-07-06	missing	missing	.
FB-69	.	.	.	.	.	315	2016-10-01	missing	missing	.
FB-77	.	.	.	.	.	332	2016-10-02	missing	missing	.
FB-98	.	.	.	.	.	387	2016-10-09	missing	missing	.
FB-01	.	.	.	.	.	17	2016-06-03	Contaminated	positive	B.tribocorum strain GDHL73; 100%
FB-03	.	.	.	.	.	19	2016-06-04	Contaminated	positive	B.tribocorum strain GDHL73; 100%
FB-04	.	.	.	.	.	20	2016-06-04	Contaminated	positive	B.tribocorum strain GDHL73; 100%
FB-06	.	.	.	.	.	27	2016-06-08	Contaminated	positive	B.tribocorum strain GDHL73; 100%
FB-07	.	.	.	.	.	28	2016-06-08	Contaminated	positive	B.tribocorum strain GDHL73; 100%
FB-08	.	.	.	.	.	29	2016-06-08	Contaminated	positive	B.tribocorum strain GDHL73; 100%
FB-09	.	.	.	.	.	37	2016-06-09	Contaminated	positive	B.tribocorum strain GDHL73; 100%
FB-10	.	.	.	.	.	40	2016-06-09	Contaminated	positive	B.tribocorum strain GDHL73; 100%
FB-11	.	.	.	.	.	27	2016-06-10	Contaminated	positive	B.tribocorum strain GDHL73; 100%
FB-14	.	.	.	.	.	48	2016-06-10	Contaminated	positive	B. tribocorum strain GDHL73; 100%
FB-16	.	.	.	.	.	50	2016-06-11	Contaminated	positive	B.tribocorum strain GDHL73; 100%
FB-17	.	.	.	.	.	51	2016-06-11	Contaminated	positive	B.tribocorum strain GDHL73; 100%
FB-18	.	.	.	.	.	52	2016-06-11	Contaminated	positive	B.tribocorum strain GDHL73; 100%
FB-19	.	.	.	.	.	36	2016-06-12	Contaminated	positive	B.tribocorum strain GDHL73; 100%
FB-20	.	.	.	.	.	53	2016-06-12	Contaminated	positive	B.tribocorum strain GDHL73; 100%
FB-21	.	.	.	.	.	54	2016-06-12	Contaminated	positive	B.tribocorum strain GDHL73; 100%
FB-22	.	.	.	.	.	55	2016-06-12	Contaminated	positive	B.tribocorum strain GDHL73; 100%
FB-23	.	.	.	.	.	56	2016-06-12	Contaminated	positive	B.tribocorum strain GDHL73; 100%
FB-24	.	.	.	.	.	57	2016-06-12	Contaminated	positive	B.tribocorum strain GDHL73; 100%
FB-25	.	.	.	.	.	93	2016-07-06	Contaminated	positive	B.tribocorum strain GDHL73; 100%
FB-26	.	.	.	.	.	94	2016-07-06	Contaminated	positive	B.tribocorum strain GDHL73; 100%
FB-27	.	.	.	.	.	95	2016-07-06	Contaminated	positive	B.tribocorum strain GDHL73; 100%
FB-32	.	.	.	.	.	105	2016-07-07	Contaminated	positive	B.tribocorum strain GDHL73; 100%
FB-33	.	.	.	.	.	108	2016-07-08	Contaminated	positive	B.tribocorum strain GDHL73; 100%
FB-34	.	.	.	.	.	109	2016-07-08	Contaminated	positive	B.tribocorum strain GDHL73; 100%
FB-35	.	.	.	.	.	112	2016-07-08	Contaminated	positive	B.tribocorum strain GDHL73; 100%
FB-36	.	.	.	.	.	113	2016-07-08	Contaminated	positive	B.tribocorum strain GDHL73; 100%
FB-37	.	.	.	.	.	115	2016-07-08	Contaminated	positive	B.tribocorum strain GDHL73; 100%
FB-76	.	.	.	.	.	331	2016-10-02	Contaminated	positive	B.tribocorum strain GDHL73; 100%
FB-79	.	.	.	.	.	335	2016-10-05	Contaminated	positive	B.tribocorum strain GDHL73; 100%
FB-80	.	.	.	.	.	339	2016-10-05	Contaminated	positive	B.tribocorum strain GDHL73; 100%
FB-81	.	.	.	.	.	344	2016-10-05	Contaminated	positive	B.tribocorum strain GDHL73; 100%
FB-83	.	.	.	.	.	347	2016-10-06	Contaminated	positive	B.tribocorum strain GDHL73; 100%
FB-88	.	.	.	.	.	363	2016-10-07	Contaminated	positive	B.tribocorum strain GDHL73; 100%
FB-89	.	.	.	.	.	365	2016-10-07	Contaminated	positive	B.tribocorum strain GDHL73; 100%
FB-91	.	.	.	.	.	374	2016-10-08	Contaminated	positive	B.tribocorum strain GDHL73; 100%
FB-96	.	.	.	.	.	383	2016-10-09	Contaminated	positive	B.tribocorum strain GDHL73; 100%
FB-02	.	.	.	.	.	18	2016-06-03	Contaminated	negative	.
FB-05	.	.	.	.	.	23	2016-06-05	Contaminated	negative	.
FB-13	.	.	.	.	.	47	2016-06-10	Contaminated	negative	.
FB-140	.	.	.	.	.	558	2016-11-12	Contaminated	negative	.
FB-141	.	.	.	.	.	561	2016-11-13	Contaminated	negative	.
FB-142	.	.	.	.	.	564	2016-11-13	Contaminated	negative	.
FB-143	.	.	.	.	.	566	2016-11-13	Contaminated	negative	.
FB-144	.	.	.	.	.	567	2016-11-13	Contaminated	negative	.
FB-29	.	.	.	.	.	100	2016-07-06	Contaminated	negative	.
FB-30	.	.	.	.	.	101	2016-07-06	Contaminated	negative	.
FB-31	.	.	.	.	.	102	2016-07-06	Contaminated	negative	.
FB-38	.	.	.	.	.	117	2016-07-08	Contaminated	negative	.
FB-78	.	.	.	.	.	334	2016-10-02	Contaminated	negative	.
FB-82	.	.	.	.	.	345	2016-10-05	Contaminated	negative	.
FB-84	.	.	.	.	.	351	2016-10-06	Contaminated	negative	.
FB-85	.	.	.	.	.	356	2016-10-07	Contaminated	negative	.
FB-86	.	.	.	.	.	358	2016-10-07	Contaminated	negative	.
FB-87	.	.	.	.	.	359	2016-10-07	Contaminated	negative	.
FB-90	.	.	.	.	.	366	2016-10-07	Contaminated	negative	.
FB-92	.	.	.	.	.	376	2016-10-08	Contaminated	negative	.
FB-93	.	.	.	.	.	377	2016-10-08	Contaminated	negative	.
FB-94	.	.	.	.	.	381	2016-10-09	Contaminated	negative	.
FB-95	.	.	.	.	.	382	2016-10-09	Contaminated	negative	.
